# Supplementary material
Source: Springer Nature journal article supplement (https://www.springermedizin.de/resource/supplementary/12967_2011_993_MOESM1_ESM.pdf/9577252)

Programs

Research and  
Development

Inventions

Assessment

Intellectual  
Property  
Protection

Marketing

Licensing

Products and  
Services

Royalty and  
Development  
Income

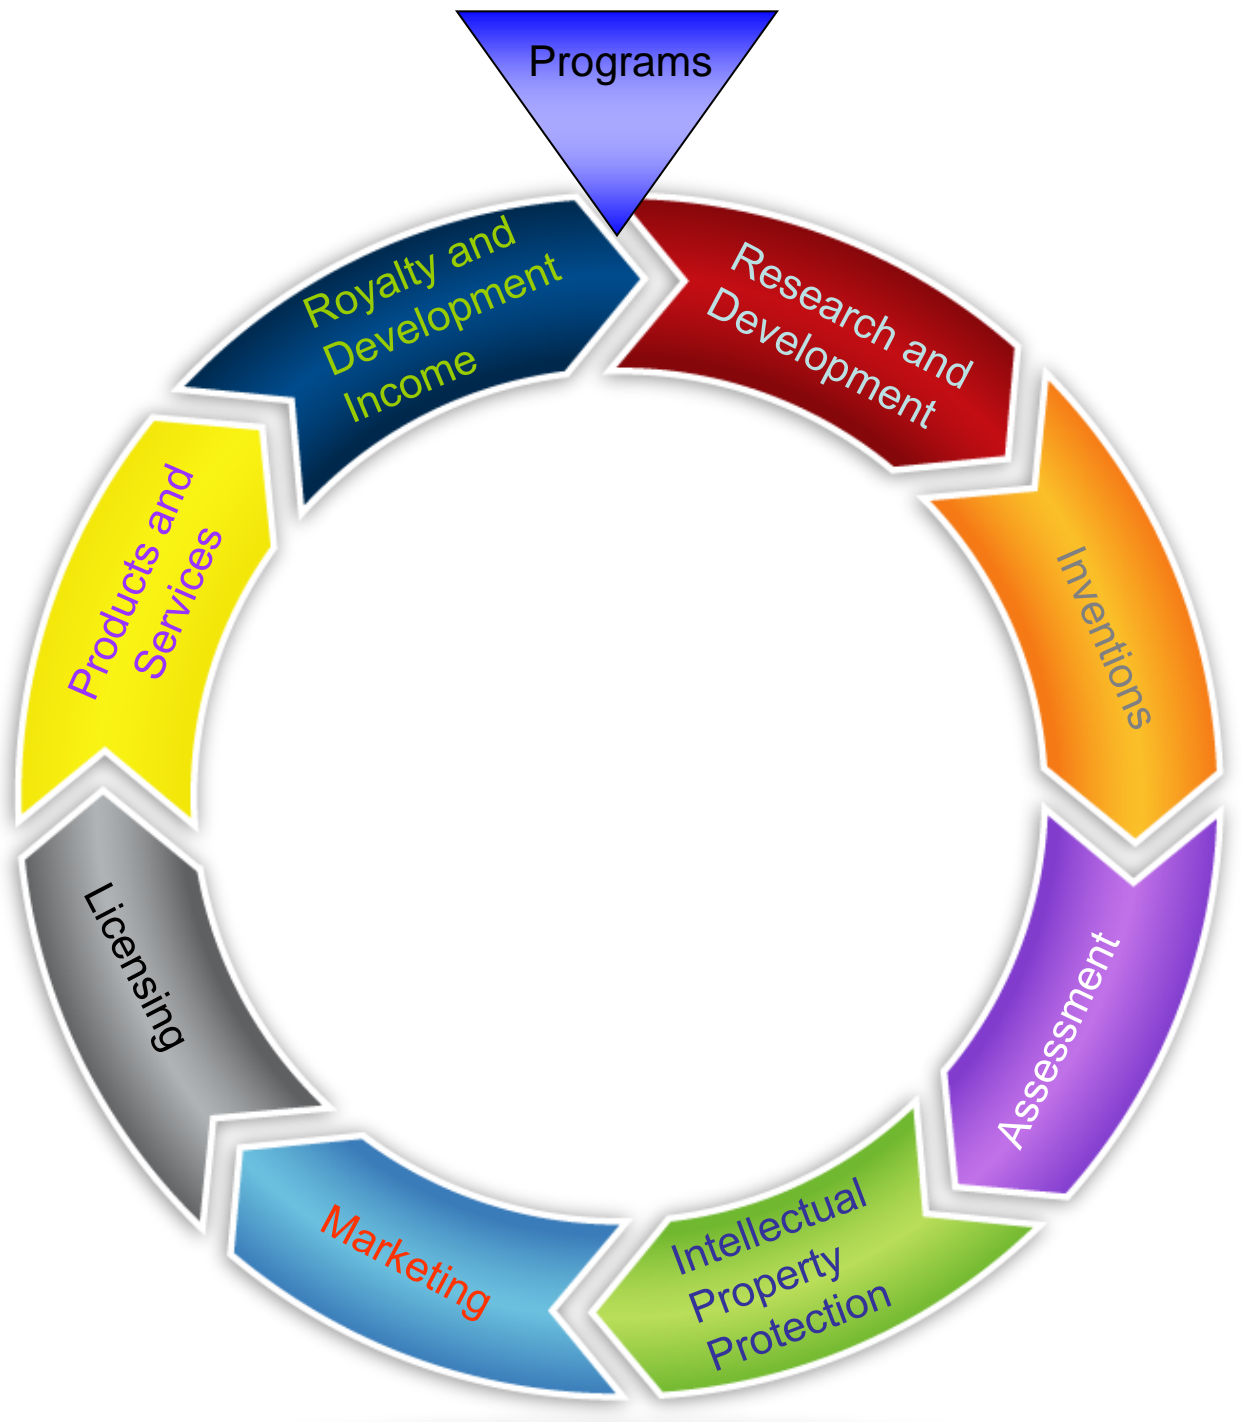

Supplement: MOESM1 [file 9577252]
